# Supplementary material
Source: PubMed Central journal article supplement (PMC8320508)
Supplement: jcsm.9142.ds001.pdf [file jcsm.9142.ds001.pdf]

**Figure S1:** Violin plots demonstrating the age and obesity adjusted residuals of systolic and diastolic blood pressure in men and women.

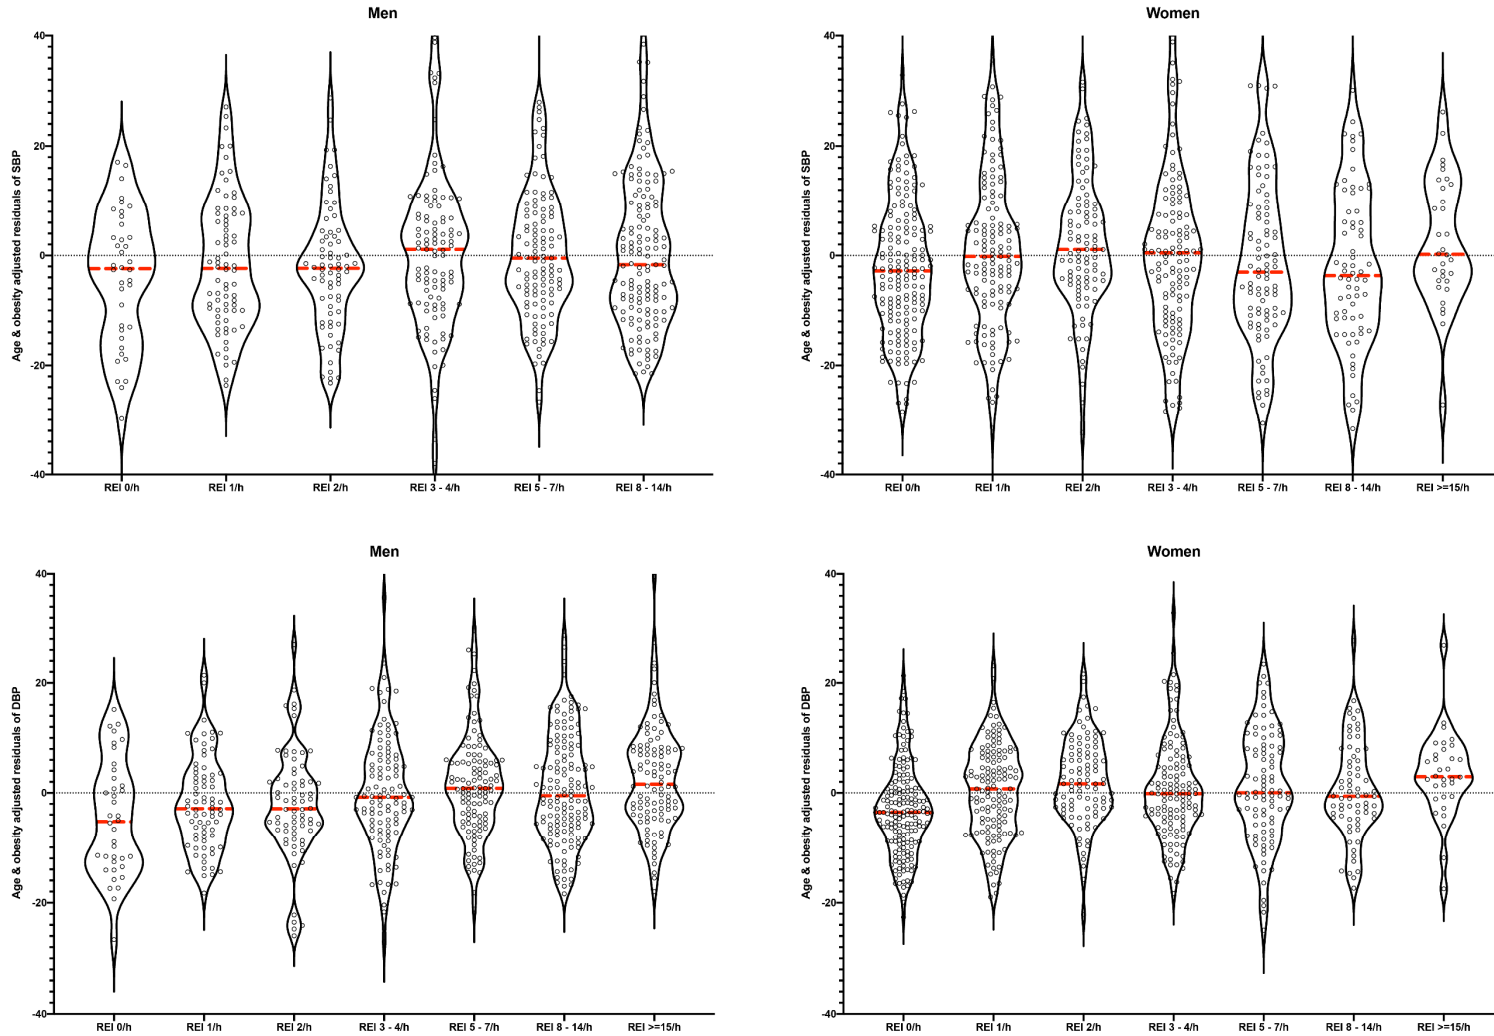

The curve estimation models of the age and obesity adjusted residuals of SBP and diastolic DBP confirmed a linear trend in men ( $p=0.027$  and  $<0.001$  respectively). In contrast, for SBP in women the data did not fit a linear model ( $p=0.547$ ) and a cubic model provided the best curve fitting ( $p=0.012$ ). For DBP in women, a linear model was possible ( $p<0.001$ ), but it was inferior to a cubic curve fitting ( $p<0.001$ ). SBP: systolic blood pressure. DPB: diastolic blood pressure. REI: respiratory event index
